# Supplementary material
Source: PubMed Central journal article supplement (PMC5528532)

Supplemental Figure S1: Venn diagrams depicting the number of studies per tumor type (color coded), the number of different microRNAs in the signatures , and the common miRNA-# in the overlap.

A: Head and Neck Squamous Cell Carcinoma

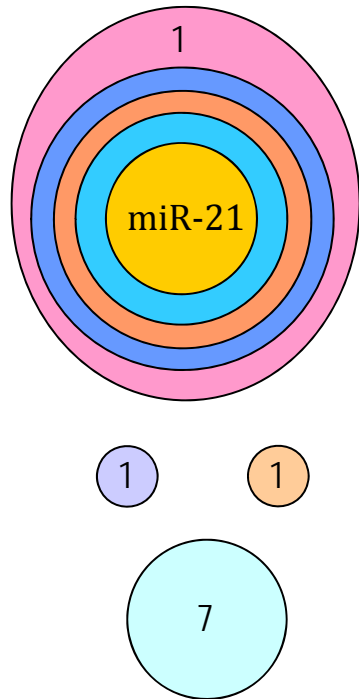

B: Pancreatic Cancer

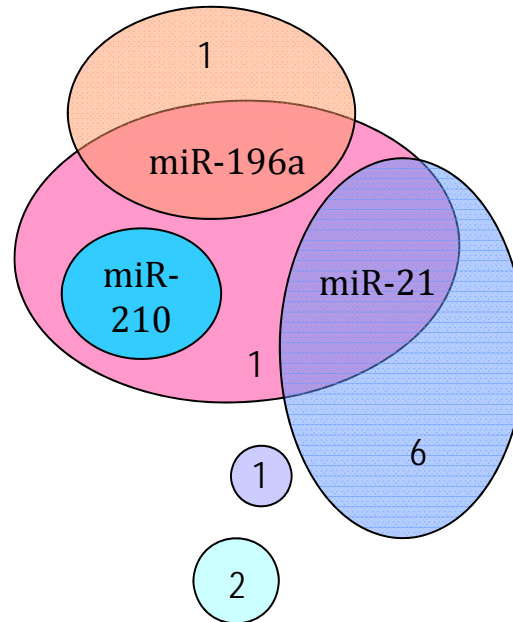

C: Gastric Cancer

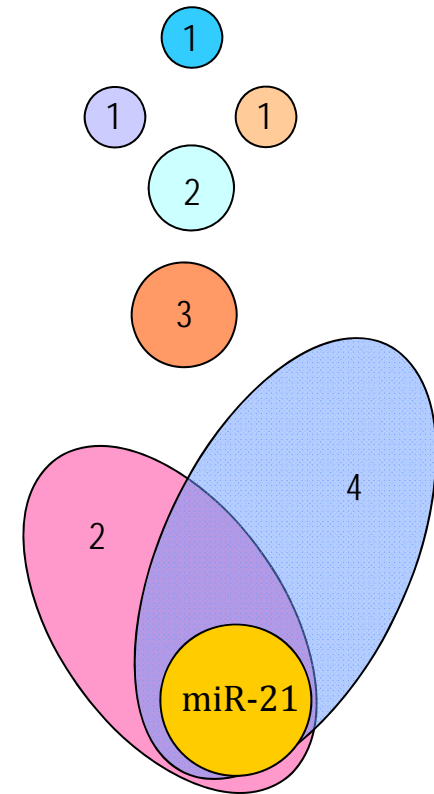

### D: Prostate Cancer

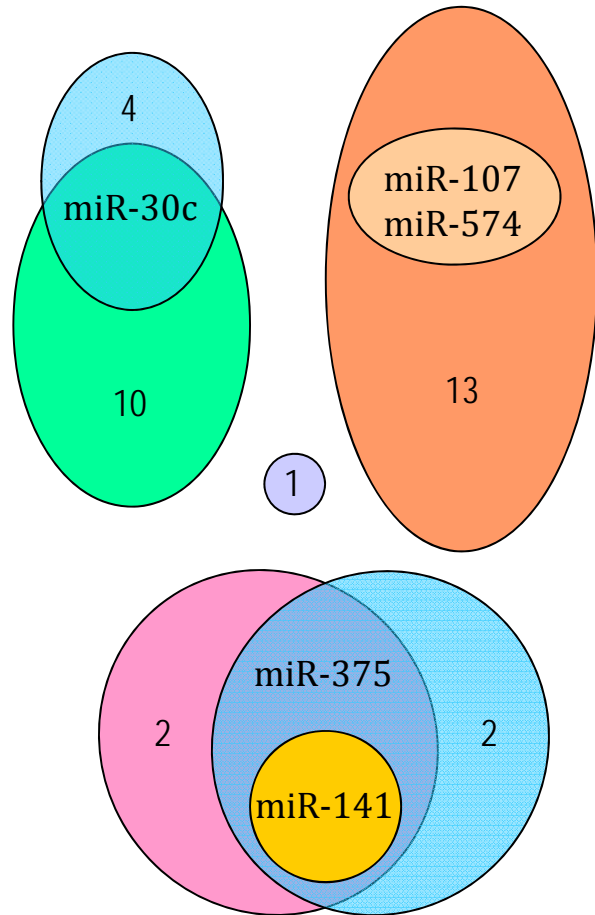

### E: Colorectal Cancer

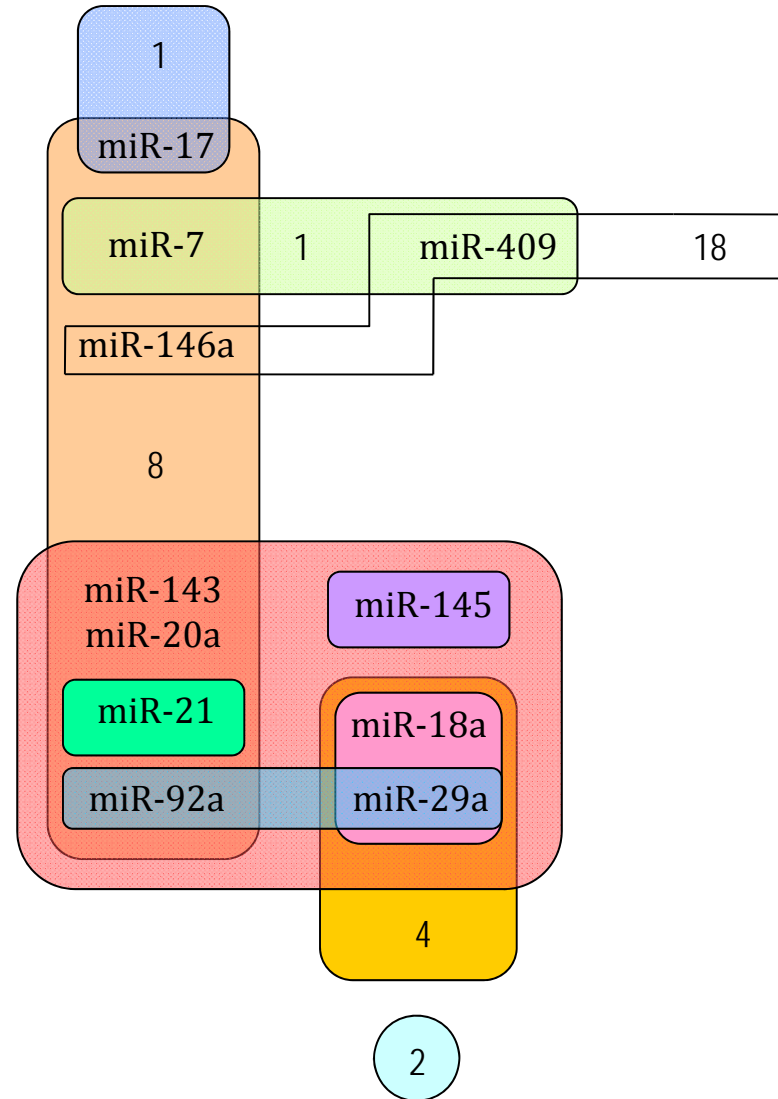

F: Breast Cancer

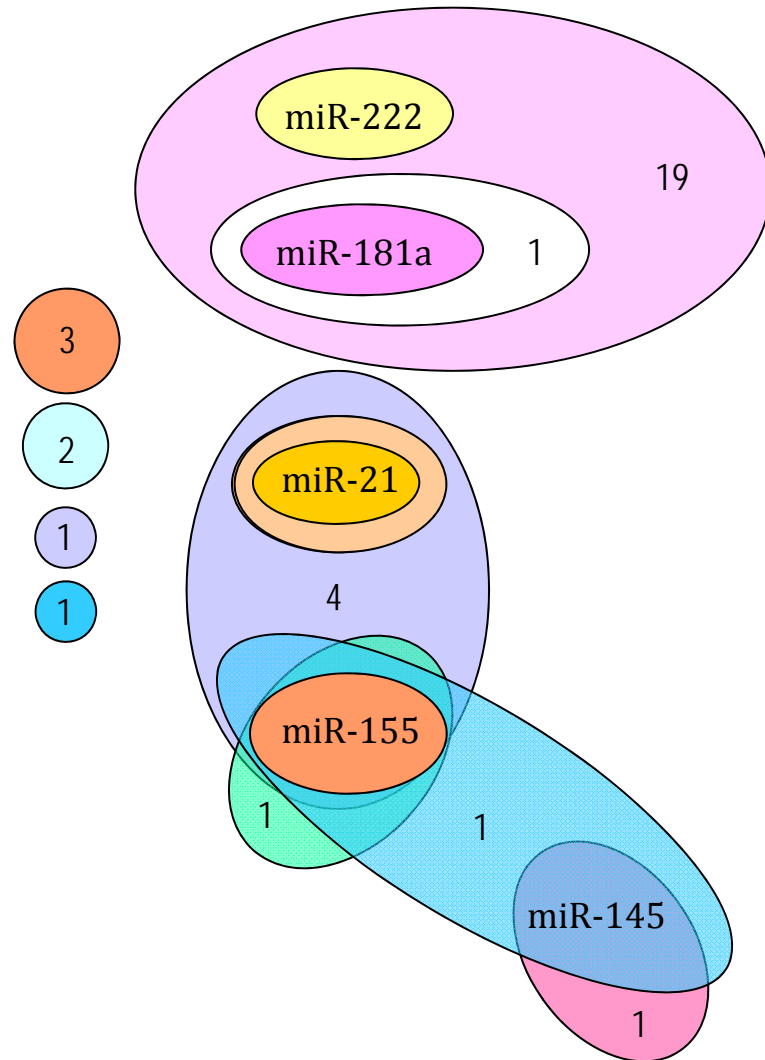

G: Non-Small Cell Lung Cancer

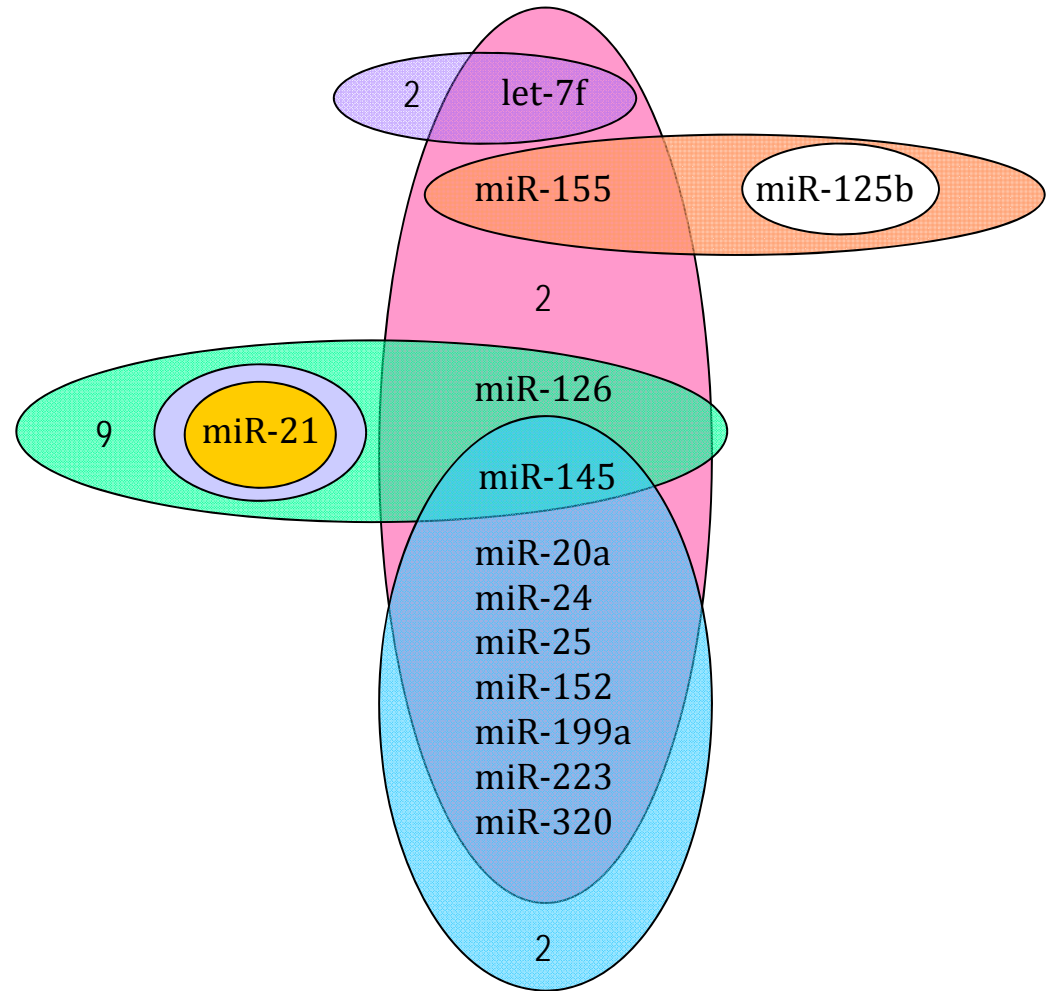

Supplement: MOL2-8-819-s001.pdf [file MOL2-8-819-s001.pdf]
